# Supplementary material for: Identification of manganese efficiency candidate genes in winter barley (Hordeum vulgare) using genome wide association mapping
Source: PubMed Central journal article supplement (PMC5050567; doi:10.1186/s12864-016-3129-9), 2016-10-04
Supplement: 12864_2016_3129_MOESM1_ESM.pdf [file 12864_2016_3129_MOESM1_ESM.pdf]

## Additional file 1

### List of the 248 winter barley varieties

| Varieties          | Collection origin | Row-type | Released decade | Country of origin | Breeder's origin                            |
|--------------------|-------------------|----------|-----------------|-------------------|---------------------------------------------|
| <b>Abondant</b>    |                   | 6        | 2000            | IT                | Cambier Semences                            |
| <b>Aci</b>         | Exbardiv          | 2        | 1990            | IT                | Istituto sperimentale per la cerealicoltura |
| <b>Ager</b>        |                   | 6        | 1963            | FR                | INRA                                        |
| <b>Aiace</b>       | Exbardiv          | 2        | 2000            | IT                | Cecop                                       |
| <b>Airone</b>      | Exbardiv          | 2        | 2000            | IT                | Istituto sperimentale per la cerealicoltura |
| <b>Ajour</b>       |                   | 2        | 2000            | SK                | Sejet                                       |
| <b>Akropolis</b>   |                   | 6        | 2000            | AT                | Saatzucht Firlbeck                          |
| <b>Alce</b>        | Exbardiv          | 2        | 2000            | IT                | Istituto sperimentale per la cerealicoltura |
| <b>Aldebaran</b>   | Exbardiv          | 6        | 2000            | IT                | D.J. Van der Have                           |
| <b>Alfeo</b>       | Exbardiv          | 2        | 2000            | IT                | Istituto sperimentale per la cerealicoltura |
| <b>Alpha</b>       |                   | 2        | 1970            | FR                | INRA                                        |
| <b>Amarena</b>     |                   | 6        | 2000            | FR                | Saaten Union                                |
| <b>Amillis</b>     | Exbardiv          | 2        | 2000            | FR                | Limagrain Europe                            |
| <b>Angela</b>      |                   | 6        | 1990            | FR                | INRA                                        |
| <b>Anisette</b>    |                   | 2        | 2000            | DK                | Sejet                                       |
| <b>Antonella</b>   |                   | 6        | 2010            | DE                | Nordsaat Saatzucht                          |
| <b>Antonia</b>     |                   | 2        | 1990            | FR                | Secobra                                     |
| <b>Apropos</b>     |                   | 2        | 2000            | DK                | Sejet                                       |
| <b>Aquarelle</b>   | Exbardiv          | 2        | 2000            | DE                | Lochow-Petkus                               |
| <b>Arcanda</b>     |                   | 2        | 2000            | AT                | Saatzucht Donau                             |
| <b>Arco</b>        |                   | 2        | 1990            | FR                | Secobra                                     |
| <b>Arda</b>        | Exbardiv          | 2        | 1980            | IT                | Istituto sperimentale per la cerealicoltura |
| <b>Arma</b>        | Exbardiv          | 6        | 1970            | FR                | Florimond Desprez                           |
| <b>Arturio</b>     |                   | 6        | 2000            | FR                | Secobra                                     |
| <b>Asso</b>        | Exbardiv          | 2        | 1990            | IT                | Società Produttori Sementi Bologna          |
| <b>Athene</b>      | Exbardiv          | 6        | 1970            | DE                | Eckendorf                                   |
| <b>Augusta</b>     |                   | 2        | 2010            | DE                | Sejet                                       |
| <b>Aydanhanim</b>  | Exbardiv          | 2        | 2000            | TR                | Central Research Institute for Field Crops  |
| <b>Azurel</b>      |                   | 6        | 2000            | FR                | Secobra                                     |
| <b>Balaki</b>      | Exbardiv          | 6        | 1990            | FR                | Secobra                                     |
| <b>Balda</b>       | Exbardiv          | 6        | 2000            | IT                | APSOV                                       |
| <b>Balkan</b>      |                   | 6        | 1990            | FR                | Nickerson                                   |
| <b>Baraka</b>      | Exbardiv          | 2        | 1980            | FR                | Serasem                                     |
| <b>Barberousse</b> |                   | 6        | 1970            | FR                | Ringot                                      |
| <b>California</b>  |                   | 2        | 2010            | UK                | Limagrain UK Ltd                            |
| <b>Camera</b>      |                   | 2        | 2000            | AT                | Nickerson UK Ltd                            |
| <b>Camion</b>      |                   | 2        | 2000            | UK                | KWS UK                                      |
| <b>Campanile</b>   |                   | 2        | 2000            | UK                | Nickerson UK Ltd                            |
| <b>Canoro</b>      | Exbardiv          | 6        | 1990            | IT                | Secobra                                     |
| <b>Cantare</b>     |                   | 2        | 2000            | DE                | Limagrain GmbH                              |
| <b>Carat</b>       | Exbardiv          | 2        | 2000            | UK                | Nickerson UK Ltd                            |
| <b>Caravan</b>     |                   | 2        | 2000            | FR                | Limagrain Europe                            |
| <b>Carola</b>      | Exbardiv          | 6        | 1990            | DE                | Nordsaat Saatzucht                          |
| <b>Casino</b>      |                   | 6        | 2010            | FR                | Momont Hennette et Fils                     |
| <b>Cassiopee</b>   |                   | 2        | 2010            | FR                | Secobra                                     |

|                   |          |   |      |     |                                             |
|-------------------|----------|---|------|-----|---------------------------------------------|
| <b>Cervoise</b>   |          | 6 | 2000 | FR  | Momont Hennette et Fils                     |
| <b>Chalup</b>     |          | 2 | 2010 | DK  | Sejet                                       |
| <b>Champie</b>    |          | 6 | 2000 | FR  | Florimond Desprez                           |
| <b>Clara</b>      | Exbardiv | 2 | 2000 | DE  | Nordsaat Saatzeit                           |
| <b>Clarine</b>    | Exbardiv | 2 | 2000 | FR  | Secobra                                     |
| <b>Colibri</b>    |          | 6 | 2000 | FR  | Momont Hennette et Fils                     |
| <b>Cordula</b>    |          | 2 | 2000 | AT  | Saatzeit Donau                              |
| <b>Crimont</b>    |          | 6 | 1980 | IT  |                                             |
| <b>Criter</b>     |          | 6 | 1980 | FR  | Nickerson                                   |
| <b>Dahlia</b>     |          | 6 | 1980 | FR  |                                             |
| <b>Daniela</b>    |          | 2 | 2010 | DK  | Sejet                                       |
| <b>Dasio</b>      | Exbardiv | 2 | 1990 | IT  | Istituto sperimentale per la cerealicoltura |
| <b>Dea</b>        | Exbardiv | 6 | 1950 | DE  | Engelen                                     |
| <b>Declic</b>     |          | 6 | 2010 | FR  | Ets Jean Lemaire-Deffontaines               |
| <b>Diadem</b>     | Exbardiv | 2 | 2000 | FR  | Serasem                                     |
| <b>Djebel</b>     |          | 6 | 2000 | FR  | Serasem                                     |
| <b>Dolmen</b>     | Exbardiv | 2 | 2000 | FR  | Momont Hennette et Fils                     |
| <b>Duchess</b>    | Exbardiv | 2 | 1990 | FR  | Ets Jean Lemaire-Deffontaines               |
| <b>Duet</b>       | Exbardiv | 2 | 1990 | UK  | Nickerson UK Ltd                            |
| <b>Dura</b>       | Exbardiv | 6 | 1960 | DE  | Streng                                      |
| <b>Esterel</b>    | Exbardiv | 6 | 1990 | FR  | Secobra                                     |
| <b>Etincel</b>    |          | 6 | 2010 | FR  | Secobra                                     |
| <b>Etrusco</b>    |          | 6 | 1980 | IT  | Federconsorz / SIS                          |
| <b>Express</b>    | Exbardiv | 6 | 1990 | FR  | Serasem                                     |
| <b>Famosa</b>     |          | 2 | 2010 | DE  | Nordic Seed / Breun                         |
| <b>Fanfare</b>    | Exbardiv | 2 | 1990 | UK  | ICI-Seeds                                   |
| <b>Federal</b>    | Exbardiv | 6 | 1990 | FR  | Secobra                                     |
| <b>Fighter</b>    | Exbardiv | 2 | 1990 | UK  | Limagrain UK Ltd                            |
| <b>Finesse</b>    | Exbardiv | 2 | 1990 | UK  | ICI-Seeds                                   |
| <b>Finlissa</b>   |          | 2 | 2000 | DK  | Nordic Seed                                 |
| <b>Fjord</b>      |          | 2 | 1990 | FR  | Secobra                                     |
| <b>Flagon</b>     |          | 2 | 2000 | UK  | Syngenta UK                                 |
| <b>Florentine</b> |          | 2 | 2000 | UK  | KWS UK                                      |
| <b>FM-9737</b>    |          | 6 | 2000 | DE  | Syngenta DE                                 |
| <b>Franka</b>     | Exbardiv | 6 | 1980 | DE  | Streng / IG Pflanzenzucht                   |
| <b>Fridericus</b> | Exbardiv | 6 | 2000 | DE  | KWS Lochow                                  |
| <b>Frost</b>      | Exbardiv | 6 | 1990 | SWE | Weibull                                     |
| <b>Gaiano</b>     |          | 6 | 1990 | IT  | Società Italiana Sementi                    |
| <b>Gerbel</b>     | Exbardiv | 6 | 1980 | FR  | Florimond Desprez                           |
| <b>Gigga</b>      |          | 6 | 2010 | FR  | Momont Hennette et Fils                     |
| <b>Gleam</b>      | Exbardiv | 2 | 1990 | UK  | CC Benoist / New Farm Crops                 |
| <b>Glenan</b>     | Exbardiv | 6 | 1980 | FR  | Nickerson                                   |
| <b>Gloria</b>     |          | 2 | 2000 | AT  | Saatzeit Streng's Erben                     |
| <b>Gospel</b>     |          | 2 | 2010 | DK  | Sejet                                       |
| <b>Gotic</b>      |          | 6 | 1990 | FR  | Florimond Desprez                           |
| <b>Grete</b>      | Exbardiv | 6 | 1990 | DE  | Eckendorf                                   |
| <b>Gudrun</b>     |          | 2 | 1990 | AT  | Landwirtschaftliche Fachschule Edelhof      |
| <b>Halcyon</b>    | Exbardiv | 2 | 1970 | UK  | PBI                                         |
| <b>Hannelore</b>  |          | 2 | 2000 | AT  | Saatzeit Donau                              |
| <b>Hasso</b>      | Exbardiv | 6 | 1980 | DE  | Lochow-Petkus                               |
| <b>Hatif-de-</b>  | Exbardiv | 6 | 1940 | FR  | Grignon                                     |
| <b>Heligan</b>    | Exbardiv | 2 | 2000 | UK  | CPB / KWS UK Limited                        |
| <b>Henriette</b>  |          | 6 | 2010 | DE  | Nordsaat Saatzeit                           |
| <b>Herfordia</b>  | Exbardiv | 6 | 1960 | DE  | Dippe                                       |
| <b>Highlight</b>  |          | 6 | 2000 | DE  | DSV                                         |
| <b>Holmes</b>     |          | 6 | 2010 | DK  | Nordic Seed                                 |
| <b>Hoppel</b>     | Exbardiv | 6 | 1970 | FR  | Blondeau                                    |
| <b>Isa</b>        | Exbardiv | 6 | 1980 | BE  |                                             |
| <b>Isacco</b>     |          | 6 | 1990 | IT  | INRA                                        |
| <b>Isocel</b>     |          | 6 | 2010 | FR  | Secobra                                     |
| <b>Jade</b>       |          | 2 | 2010 | DE  | KWS UK                                      |

|                     |          |   |      |     |                                             |
|---------------------|----------|---|------|-----|---------------------------------------------|
| <b>Jaidor</b>       | Exbardiv | 6 | 1980 | FR  | INRA                                        |
| <b>Jewel</b>        | Exbardiv | 2 | 1990 | UK  | Nickerson UK Ltd                            |
| <b>Kaskade</b>      | Exbardiv | 2 | 1980 | DE  | BPZ-Saatenring                              |
| <b>Katja</b>        |          | 2 | 1970 | AT  | Saatzucht Donau                             |
| <b>Kelibia</b>      | Exbardiv | 2 | 1990 | FR  | Limagrain Europe                            |
| <b>Kestrel</b>      | Exbardiv | 2 | 1990 | UK  | Breun                                       |
| <b>Ketos</b>        | Exbardiv | 6 | 2000 | FR  | Limagrain Europe                            |
| <b>KWS-Ariane</b>   |          | 2 | 2010 | DE  | KWS Lochow                                  |
| <b>KWS-Cassia</b>   |          | 2 | 2010 | UK  | KWS UK                                      |
| <b>KWS-Glacier-</b> |          | 2 | 2010 | UK  | KWS UK                                      |
| <b>KWS-Joy</b>      |          | 2 | 2010 | DE  | KWS Lochow                                  |
| <b>KWS-Liga</b>     |          | 2 | 2010 | DE  | KWS Lochow                                  |
| <b>KWS-Meridian</b> |          | 6 | 2010 | DE  | KWS Lochow                                  |
| <b>KWS-Scala</b>    |          | 2 | 2010 | DE  | KWS Lochow                                  |
| <b>KWS-Tenor</b>    |          | 6 | 2010 | DE  | KWS Lochow                                  |
| <b>Labea</b>        | Exbardiv | 2 | 1990 | DE  | Breun                                       |
| <b>Laverda</b>      | Exbardiv | 6 | 2000 | DE  | Nordsaat Saatzucht                          |
| <b>Leibniz</b>      |          | 6 | 2000 | DE  | KWS Lochow                                  |
| <b>Leonie</b>       | Exbardiv | 2 | 2000 | UK  | Nordsaat Saatzucht                          |
| <b>Letizia</b>      |          | 6 | 2000 | IT  | Istituto sperimentale per la cerealicoltura |
| <b>Lombard</b>      |          | 2 | 1990 | IT  | Florimond Desprez                           |
| <b>Lomerit</b>      |          | 6 | 2000 | DE  | KWS Lochow                                  |
| <b>Lonni</b>        | Exbardiv | 6 | 2000 | DK  | Pajbjergfonden                              |
| <b>Lorena</b>       | Exbardiv | 6 | 1990 | DE  | Saaten-Ring                                 |
| <b>Ludmilla</b>     | Exbardiv | 6 | 2000 | DE  | Saatzucht Firlbeck                          |
| <b>Lutece</b>       | Exbardiv | 6 | 2000 | IT  | Serasem                                     |
| <b>Magie</b>        | Exbardiv | 2 | 1990 | FR  | Serasem / Ackermann                         |
| <b>Majestic</b>     |          | 6 | 1990 | FR  | Unisigma                                    |
| <b>Malice</b>       |          | 2 | 2000 | FR  | Unisigma                                    |
| <b>Malicorne</b>    |          | 2 | 2000 | FR  | Unisigma                                    |
| <b>Malta</b>        | Exbardiv | 2 | 1970 | DE  | Ackermann Saatzucht                         |
| <b>Malwinta</b>     | Exbardiv | 2 | 2000 | DK  | Pajbjergfonden                              |
| <b>Manitou</b>      | Exbardiv | 6 | 1990 | FR  | Secobra                                     |
| <b>Manolia</b>      | Exbardiv | 2 | 2000 | FR  | Secobra                                     |
| <b>Marado</b>       | Exbardiv | 6 | 2000 | FR  | Serasem                                     |
| <b>Marinka</b>      | Exbardiv | 2 | 1990 | NLD | Cebeco                                      |
| <b>Maris-Otter</b>  | Exbardiv | 2 | 1960 | UK  | Robin Appel Ltd / PBI                       |
| <b>Maris-Trojan</b> | Exbardiv | 2 | 1970 | UK  | PBI                                         |
| <b>Matros</b>       |          | 2 | 2010 | DK  | Sejet                                       |
| <b>Mattina</b>      | Exbardiv | 6 |      | FR  | INRA                                        |
| <b>Melanie</b>      | Exbardiv | 2 | 1990 | DE  | Breun                                       |
| <b>Menhir</b>       |          | 2 | 2000 | FR  | RAGT / Engelen                              |
| <b>Mercedes</b>     |          | 6 | 2000 | DE  | Secobra                                     |
| <b>Metaxa</b>       |          | 2 | 2000 | DE  | Ackermann Saatzucht                         |
| <b>MH-Firenzza</b>  |          | 2 | 2010 | DE  | KWS Lochow                                  |
| <b>Micuccio</b>     |          | 6 | 1970 | IT  | Pepe-Gravina                                |
| <b>Mirco</b>        | Exbardiv | 6 | 1980 | IT  | Coopsementi srl / Sassano                   |
| <b>Mirra</b>        | Exbardiv | 6 | 1970 | DE  | Eckendorf                                   |
| <b>Montana</b>      | Exbardiv | 2 | 1990 | NLD | Probstdorfer Saatzucht                      |
| <b>Murcie</b>       | Exbardiv | 2 | 2000 | FR  | Florimond Desprez                           |
| <b>Muscat</b>       | Exbardiv | 6 | 1990 | UK  | CPB / KWS UK Limited                        |
| <b>Naomie</b>       | Exbardiv | 6 | 2000 | DE  | Ackermann Saatzucht                         |
| <b>Nerz</b>         |          | 6 | 2000 | DE  | KWS Lochow                                  |
| <b>Nikel</b>        |          | 6 | 1990 | DE  | Eckendorf / Serasem                         |
| <b>Nure</b>         | Exbardiv | 2 | 2000 | IT  | Istituto sperimentale per la cerealicoltura |
| <b>Onice</b>        | Exbardiv | 6 | 1980 | IT  | Società Italiana Sementi                    |
| <b>Opal</b>         | Exbardiv | 2 | 2000 | DE  | Nickerson UK Ltd                            |
| <b>Orbise</b>       |          | 2 | 2000 | FR  | RAGT                                        |
| <b>Orchidea</b>     |          | 2 | 2000 | IT  | GEA Sementi                                 |
| <b>Ordinale</b>     |          | 2 | 2010 | FR  | RAGT                                        |
| <b>Orjoie</b>       |          | 2 | 2010 | FR  | RAGT                                        |

|                   |          |   |      |     |                                           |
|-------------------|----------|---|------|-----|-------------------------------------------|
| <b>Panda</b>      | Exbardiv | 2 | 1980 | FR  | Desprez                                   |
| <b>Passerel</b>   |          | 6 | 2010 | FR  | Secobra                                   |
| <b>Passport</b>   | Exbardiv | 6 | 2000 | FR  | Lemaire Deffontaines                      |
| <b>Pastoral</b>   | Exbardiv | 2 | 1990 | FR  | Secobra                                   |
| <b>Patricia</b>   | Exbardiv | 6 | 1990 | AT  | Probstdorfer Saatzucht                    |
| <b>Pearl</b>      | Exbardiv | 2 | 2000 | UK  | Nickerson UK Ltd                          |
| <b>Pelican</b>    |          | 6 | 2000 | FR  | Saaten Union                              |
| <b>Perga</b>      |          | 6 | 1960 | DE  | Heine-Peragis                             |
| <b>Pilastro</b>   | Exbardiv | 6 | 1990 | IT  | Società Italiana Sementi                  |
| <b>Pirate</b>     | Exbardiv | 6 | 1980 | FR  | Ringot                                    |
| <b>Plaisant</b>   | Exbardiv | 6 | 1980 | FR  | GAE                                       |
| <b>Platine</b>    | Exbardiv | 2 | 2000 | FR  | Serasem                                   |
| <b>Pompadour</b>  |          | 2 | 2010 | FR  | Cambridge Plant Breeders / RAGT           |
| <b>Ponente</b>    | Exbardiv | 6 |      | IT  | Cecop                                     |
| <b>Precosa</b>    |          | 2 | 2010 | AT  | Saatzucht Dr. Hans Hege                   |
| <b>Princess</b>   | Exbardiv | 6 | 1990 | FR  | Lemaire Deffontaines                      |
| <b>Puffin</b>     | Exbardiv | 2 | 1990 | UK  | ICI-Seeds                                 |
| <b>Red</b>        |          | 2 | 1990 | IT  | Coopsementi srl                           |
| <b>Reflexion</b>  |          | 6 | 2010 | FR  | Lemaire Deffontaines                      |
| <b>Retriever</b>  |          | 2 | 2000 | UK  | KWS UK                                    |
| <b>Robur</b>      | Exbardiv | 6 | 1970 | FR  | INRA                                      |
| <b>Roseval</b>    |          | 6 | 2010 | BE  | Jorion                                    |
| <b>Saffron</b>    |          | 2 | 2000 | UK  | KWS UK                                    |
| <b>Saigon</b>     | Exbardiv | 2 | 2000 | UK  | Nickerson UK Ltd                          |
| <b>Salamandre</b> |          | 2 | 2010 | FR  | Secobra                                   |
| <b>Salling</b>    |          | 2 | 2000 | UK  | Limagrain UK Ltd                          |
| <b>Samson</b>     |          | 6 | 1990 | IT  | Cambier Semences                          |
| <b>Selvaggio</b>  |          | 6 | 1980 | IT  |                                           |
| <b>Senta</b>      | Exbardiv | 6 | 1960 | DE  | Engelen                                   |
| <b>Sequel</b>     |          | 6 | 2000 | UK  | Syngenta UK                               |
| <b>Sereno</b>     |          | 6 | 2010 | IT  | Societa Agricola Tara di Andrea Guerresi  |
| <b>Siberia</b>    |          | 6 | 2000 | FR  | Secobra                                   |
| <b>Sinatra</b>    |          | 2 | 2010 | UK  | Sejet                                     |
| <b>SJ-NUE16</b>   | Sejet    | 2 | 2010 | DK  | Sejet                                     |
| <b>SJ-NUE17</b>   | Sejet    | 2 | 2010 | DK  | Sejet                                     |
| <b>SJ-NUE18</b>   | Sejet    | 2 | 2010 | DK  | Sejet                                     |
| <b>SJ-NUE19</b>   | Sejet    | 2 | 2010 | DK  | Sejet                                     |
| <b>SJ-NUE20</b>   | Sejet    | 2 | 2010 | DK  | Sejet                                     |
| <b>SJ-NUE21</b>   | Sejet    | 2 | 2010 | DK  | Sejet                                     |
| <b>SJ-NUE22</b>   | Sejet    | 2 | 2010 | DK  | Sejet                                     |
| <b>SJ-NUE23</b>   | Sejet    | 2 | 2010 | DK  | Sejet                                     |
| <b>SJ-NUE24</b>   | Sejet    | 2 | 2010 | DK  | Sejet                                     |
| <b>SJ-NUE25</b>   | Sejet    | 2 | 2010 | DK  | Sejet                                     |
| <b>SJ-NUE26</b>   | Sejet    | 2 | 2010 | DK  | Sejet                                     |
| <b>SJ-NUE27</b>   | Sejet    | 2 | 2010 | DK  | Sejet                                     |
| <b>SJ-NUE28</b>   | Sejet    | 2 | 2010 | DK  | Sejet                                     |
| <b>SJ-NUE29</b>   | Sejet    | 2 | 2010 | DK  | Sejet                                     |
| <b>SJ-NUE30</b>   | Sejet    | 2 | 2010 | DK  | Sejet                                     |
| <b>SJ-NUE31</b>   | Sejet    | 2 | 2010 | DK  | Sejet                                     |
| <b>SJ-NUE32</b>   | Sejet    | 2 | 2010 | DK  | Sejet                                     |
| <b>SJ-NUE33</b>   | Sejet    | 2 | 2010 | DK  | Sejet                                     |
| <b>Skamling</b>   |          | 2 | 2010 | DK  | Ackermann Saatzucht / Nordic Seed         |
| <b>Sonja</b>      | Exbardiv | 2 | 1970 | DE  | Engelen / Secobra                         |
| <b>Sonora</b>     | Exbardiv | 6 | 1990 | FR  | Nickerson                                 |
| <b>Souleyka</b>   |          | 6 | 2010 | FR  | Lemaire Deffontaines / Nordsaat Saatzucht |
| <b>Sprite</b>     | Exbardiv | 2 | 1990 | UK  | PBI                                       |
| <b>Talisman</b>   |          | 2 | 2010 | DK  | Sejet                                     |
| <b>Tamaris</b>    |          | 6 | 1990 | FR  | Secobra                                   |
| <b>Tapir</b>      | Exbardiv | 6 | 1980 | NLD | Semundo BV / HAEG                         |
| <b>Target</b>     | Exbardiv | 2 | 1990 | UK  | New Farm Crops                            |
| <b>Theresa</b>    |          | 6 | 1990 | FR  | Secobra                                   |

|                     |          |   |      |     |                                             |
|---------------------|----------|---|------|-----|---------------------------------------------|
| <b>Tiffany</b>      | Exbardiv | 2 | 2000 | DE  | Breun                                       |
| <b>Tipper</b>       |          | 2 | 1980 | UK  | Nickerson UK Ltd                            |
| <b>Torrent</b>      | Exbardiv | 2 | 1980 | UK  | Nickerson / RPB                             |
| <b>Touareg</b>      |          | 6 | 2010 | FR  | Lemaire Deffontaines                        |
| <b>Trasimeno</b>    | Exbardiv | 2 |      | YUG | Poljoprivredni Institut                     |
| <b>Trebbia</b>      | Exbardiv | 6 | 1990 | IT  | Istituto sperimentale per la cerealicoltura |
| <b>Tria</b>         | Exbardiv | 2 | 1960 | DE  | Ackermann Saatucht                          |
| <b>Ultra</b>        |          | 2 | 1980 | IT  | Firlbeck                                    |
| <b>Vanessa</b>      | Exbardiv | 2 | 2000 | DE  | Breun                                       |
| <b>Verticale</b>    | Exbardiv | 2 | 2000 | FR  | Serasem                                     |
| <b>Vertige</b>      |          | 2 | 1990 | FR  | Serasem                                     |
| <b>Vetulio</b>      |          | 6 | 1980 | IT  |                                             |
| <b>Vogelsanger-</b> | Exbardiv | 6 | 1960 | DE  | Hauptsaaen                                  |
| <b>Winsome</b>      |          | 2 | 2010 | UK  | Syngenta UK                                 |
| <b>Wintmalt</b>     |          | 2 | 2000 | UK  | KWS Lochow                                  |
| <b>Yatzy</b>        |          | 2 | 2010 | DK  | Sejet                                       |
| <b>Yokohama</b>     |          | 6 | 2010 | DE  | DSV                                         |
| <b>Zacinto</b>      | Exbardiv | 2 | 2000 | IT  | Istituto sperimentale per la cerealicoltura |
| <b>Zoe</b>          | Exbardiv | 6 | 2000 | DE  |                                             |
