# Supplementary material for: Identification of manganese efficiency candidate genes in winter barley (Hordeum vulgare) using genome wide association mapping
Source: PubMed Central journal article supplement (PMC5050567; doi:10.1186/s12864-016-3129-9), 2016-10-04
Supplement: 12864_2016_3129_MOESM2_ESM.pdf [file 12864_2016_3129_MOESM2_ESM.pdf]

**Additional file 2**

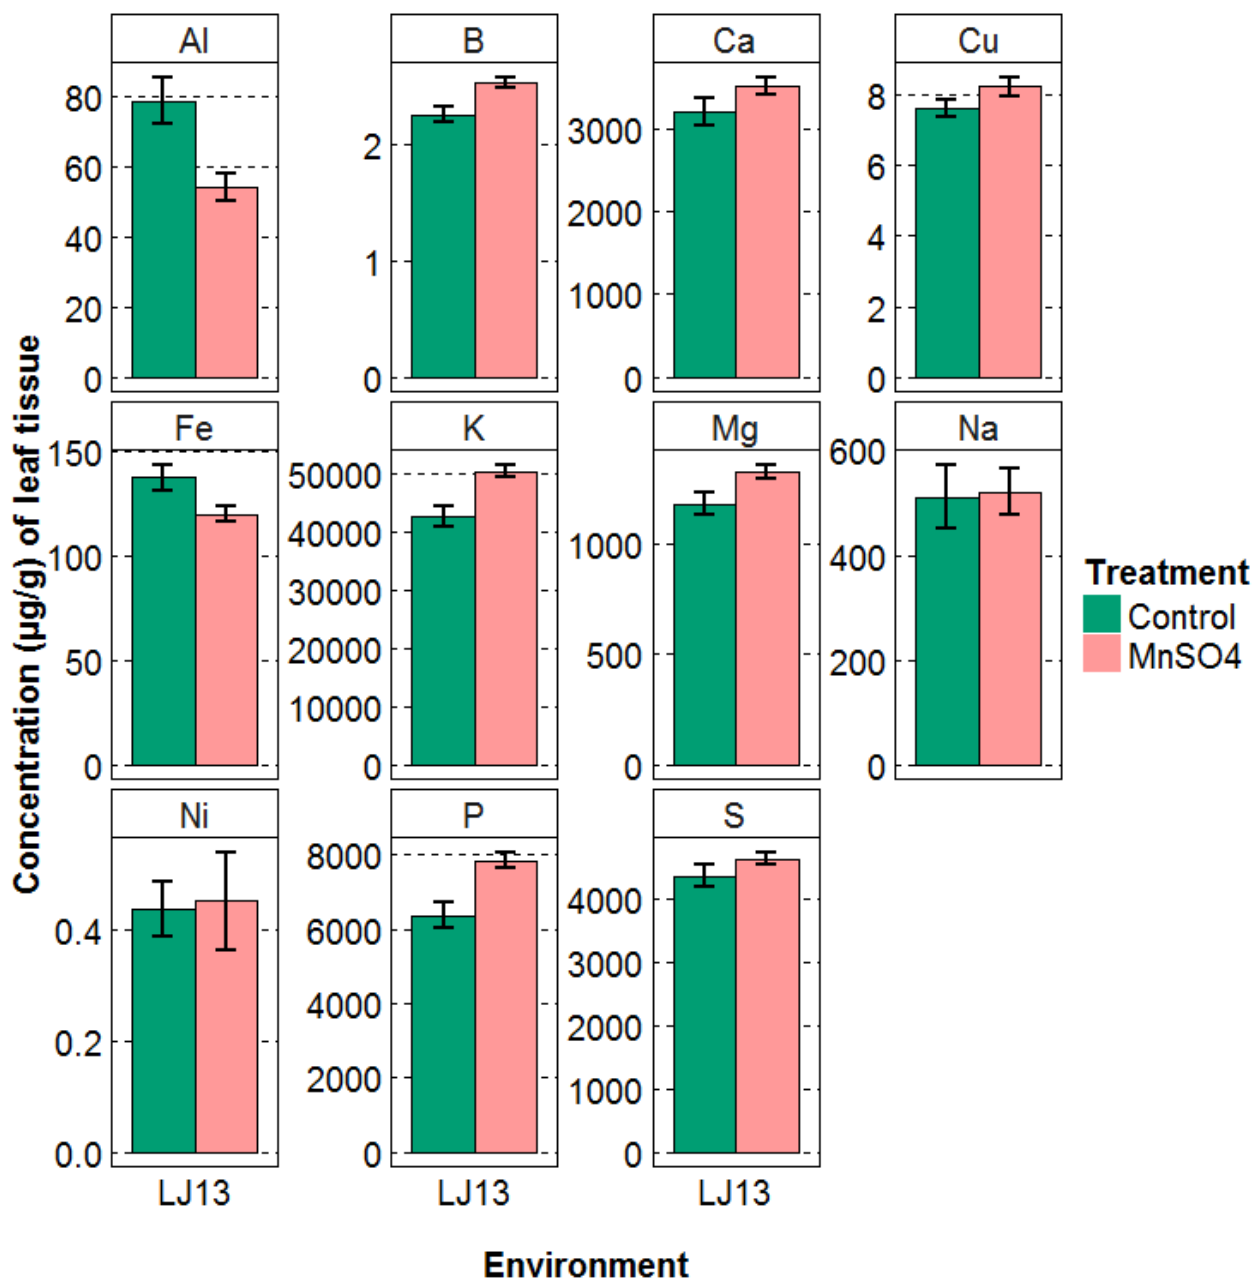

Figure of elemental profiles of the controls plants in LJ13 in  $\mu\text{g}\cdot\text{g}^{-1}$  of leaf dry weight and their standard error bars.
