# Supplementary material for: Identification of manganese efficiency candidate genes in winter barley (Hordeum vulgare) using genome wide association mapping
Source: PubMed Central journal article supplement (PMC5050567; doi:10.1186/s12864-016-3129-9), 2016-10-04
Supplement: 12864_2016_3129_MOESM4_ESM.pdf [file 12864_2016_3129_MOESM4_ESM.pdf]

## Additional file 4

### Association results for JIP parameters

Summary of significant ( $-\log_{10}(P_{\text{Val}}) \geq 3$ ) marker-trait associations identified by GWA for the fluorescence parameters traits and the corresponding candidate genes from their Blast results. Allelic effect sign are estimated with respect to the minor allele. SNPs are ordered by location and genome position. (\*Minor Allele Frequency, \*\* Standard error).

| Fluorescence parameters | Location | Marker name    | Position       |       | GWA statistics  |      |        |       | BLAST results |              |             |                                               |
|-------------------------|----------|----------------|----------------|-------|-----------------|------|--------|-------|---------------|--------------|-------------|-----------------------------------------------|
|                         |          |                | Chrom          | cM    | $-\log_{10}(P)$ | MAF* | Effect | SE**  | Gene          | cM           | Description |                                               |
| Area                    | GH13A    | SCRI_RS_193456 | 5H             | 169.4 | 3.7             | 0.09 | -3949  | 1038  | -             | -            | -           |                                               |
|                         |          | 12_10596       | 6H             | 68.2  | 3.0             | 0.28 | -2374  | 712   | -             | -            | -           |                                               |
|                         |          |                | SCRI_RS_153727 |       | 70.7            | 3.1  | 0.21   | 6386  | 1872          |              |             |                                               |
|                         |          |                | SCRI_RS_1473   | 1H    | 71.2            | 3.1  | 0.21   | -6317 | 1873          | AK357833     | 70.7        | Chlorophyll a/b binding protein               |
|                         |          |                | SCRI_RS_169123 |       | 71.2            | 3.5  | 0.34   | 6103  | 1675          |              |             |                                               |
|                         |          |                | 11_21057       | 2H    | 40.1            | 3.3  | 0.21   | 6493  | 1854          | AK368803     | 40.0        | Photosystem I PsaN, reaction centre subunit N |
|                         |          |                | 11_20135       |       | 54.3            | 3.2  | 0.08   | -8619 | 2484          |              |             |                                               |
|                         |          |                | 11_20472       | 4H    | 54.3            | 3.2  | 0.08   | 8619  | 2484          | AK357955     | 54.3        | PP2C, Mn/Mg aspartate binding site            |
|                         |          |                | 11_21017       |       | 54.3            | 3.2  | 0.08   | -8619 | 2484          |              |             |                                               |
|                         |          | GH13B          | 12_30839       |       | 54.3            | 3.2  | 0.08   | 8619  | 2484          | AK249774.1   | 54.3        | Photosystem II PsbP, oxygen evolving complex  |
|                         |          |                | 11_20750       |       | 61.5            | 4.5  | 0.42   | -6357 | 1492          |              |             |                                               |
|                         |          |                | 12_10657       |       | 61.5            | 4.5  | 0.42   | -6357 | 1492          |              |             |                                               |
|                         |          |                | SCRI_RS_152299 | 7H    | 61.7            | 3.9  | 0.33   | -6237 | 1594          |              |             |                                               |
|                         |          |                | 11_20975       |       | 61.8            | 4.8  | 0.40   | -6569 | 1484          | MLOC_56051.1 | 65.4        | Chlorophyll a/b binding protein               |
|                         |          |                | 12_30149       |       | 62.4            | 4.2  | 0.36   | 6241  | 1531          |              |             |                                               |
|                         |          |                | SCRI_RS_132425 |       | 62.4            | 4.1  | 0.36   | -6112 | 1512          |              |             |                                               |
|                         |          |                | SCRI_RS_137263 |       | 77.1            | 3.1  | 0.38   | -4062 | 1196          |              |             |                                               |
|                         |          | LJ13           | 11_10287       | 2H    | 79.9            | 3.1  | 0.38   | 4062  | 1196          | AK364127     | 74.3        | Photosystem II PsbQ, oxygen evolving complex  |
|                         |          |                | 12_30897       |       | 80.0            | 3.9  | 0.47   | -3326 | 859           |              |             |                                               |

|                      |  |              |                |    |       |     |      |        |       |              |              |                                                |
|----------------------|--|--------------|----------------|----|-------|-----|------|--------|-------|--------------|--------------|------------------------------------------------|
|                      |  |              | 12_30901       |    | 80.0  | 4.0 | 0.45 | 3355   | 847   |              |              |                                                |
|                      |  |              | SCRI_RS_196853 |    | 80.6  | 3.9 | 0.47 | 3326   | 859   |              |              |                                                |
|                      |  |              | SCRI_RS_88704  |    | 80.6  | 3.9 | 0.47 | 3326   | 859   |              |              |                                                |
|                      |  |              | SCRI_RS_126439 |    | 81.5  | 3.0 | 0.17 | -4743  | 1416  |              |              |                                                |
|                      |  |              | SCRI_RS_159462 |    | 81.5  | 3.0 | 0.17 | -4743  | 1416  |              |              |                                                |
|                      |  |              | SCRI_RS_160833 |    | 81.5  | 3.0 | 0.17 | 4743   | 1416  |              |              |                                                |
|                      |  |              | SCRI_RS_165463 |    | 81.5  | 3.0 | 0.17 | -4743  | 1416  |              |              |                                                |
|                      |  |              | SCRI_RS_211281 |    | 81.5  | 3.0 | 0.17 | -4743  | 1416  |              |              |                                                |
|                      |  |              | 12_10936       |    | 81.8  | 3.7 | 0.24 | 3751   | 989   |              |              |                                                |
|                      |  |              | 12_31424       |    | 81.8  | 3.7 | 0.24 | 3751   | 989   |              |              |                                                |
|                      |  |              | SCRI_RS_179213 |    | 81.8  | 3.0 | 0.17 | -4743  | 1416  |              |              |                                                |
|                      |  |              | SCRI_RS_188339 |    | 81.8  | 3.0 | 0.17 | -4743  | 1416  |              |              |                                                |
|                      |  |              | 11_21351       |    | 82.5  | 3.7 | 0.24 | 3751   | 989   |              |              |                                                |
|                      |  |              | 12_10969       |    | 82.5  | 3.7 | 0.24 | 3751   | 989   |              |              |                                                |
|                      |  |              | SCRI_RS_119261 |    | 82.5  | 3.7 | 0.24 | 3751   | 989   |              |              |                                                |
|                      |  |              | SCRI_RS_138463 |    | 82.5  | 3.0 | 0.17 | -4743  | 1416  |              |              |                                                |
|                      |  |              | SCRI_RS_155456 |    | 82.5  | 3.6 | 0.25 | -3661  | 990   |              |              |                                                |
|                      |  |              | SCRI_RS_162798 |    | 82.5  | 3.7 | 0.24 | 3751   | 989   |              | MLOC_17228.1 |                                                |
|                      |  |              | SCRI_RS_183984 |    | 82.5  | 3.7 | 0.24 | 3751   | 989   |              |              |                                                |
|                      |  |              | SCRI_RS_237481 |    | 82.5  | 3.6 | 0.25 | -3661  | 990   |              |              |                                                |
|                      |  |              | 11_21037       |    | 82.8  | 4.7 | 0.40 | -4943  | 1132  |              |              |                                                |
|                      |  |              | SCRI_RS_160616 |    | 86.9  | 3.0 | 0.17 | 4743   | 1416  |              |              |                                                |
|                      |  |              | SCRI_RS_235221 |    | 86.9  | 3.0 | 0.17 | 4743   | 1416  |              |              |                                                |
|                      |  |              | SCRI_RS_195051 |    | 146.5 | 3.0 | 0.41 | 2470   | 738   | -            | -            | -                                              |
|                      |  |              | 11_10294       |    | 46.6  | 3.1 | 0.16 | -0.008 | 0.002 | MLOC_61942.1 | 50.9         | PP2C, Mn/Mg aspartate binding site             |
|                      |  | <b>GH13A</b> | SCRI_RS_221759 | 1H | 46.6  | 3.9 | 0.08 | -0.011 | 0.003 |              |              |                                                |
|                      |  |              | SCRI_RS_184488 | 7H | 120.8 | 3.3 | 0.01 | 0.024  | 0.007 | MLOC_77860.1 | 124.6        | Photosystem II PsbP, oxygen evolving complex   |
|                      |  |              |                |    |       |     |      |        |       | MLOC_3173.4  | 124.6        | PP2C, Mn/Mg aspartate binding site             |
|                      |  |              | 12_30992       |    | 43.3  | 3.2 | 0.15 | 0.011  | 0.003 |              |              |                                                |
|                      |  | <b>GH13B</b> | SCRI_RS_190764 | 4H | 43.3  | 3.9 | 0.15 | -0.012 | 0.003 | -            | -            | -                                              |
|                      |  |              | 12_10371       |    | 43.5  | 3.9 | 0.15 | -0.012 | 0.003 |              |              |                                                |
|                      |  |              | 11_10834       | 5H | 94.7  | 3.9 | 0.03 | 0.021  | 0.005 | -            | -            | -                                              |
| <b>V<sub>I</sub></b> |  |              | 11_20908       | 1H | 116.5 | 3.1 | 0.40 | 0.004  | 0.001 | MLOC_53469.2 | 117.5        | Photosystem I PsaH, reaction centre subunit VI |
|                      |  |              | 12_30823       | 2H | 140.8 | 3.2 | 0.11 | 0.005  | 0.001 | -            | -            | -                                              |
|                      |  |              | SCRI_RS_209312 |    | 15.1  | 3.2 | 0.02 | -0.011 | 0.003 |              |              |                                                |
|                      |  |              | SCRI_RS_135155 | 3H | 135.5 | 3.0 | 0.03 | 0.008  | 0.002 | -            | -            | -                                              |
|                      |  |              | SCRI_RS_144313 |    | 135.5 | 4.4 | 0.01 | 0.015  | 0.003 |              |              |                                                |
|                      |  | <b>LJ13</b>  | SCRI_RS_238610 | 4H | 69.0  | 3.4 | 0.01 | 0.013  | 0.004 | -            | -            | -                                              |
|                      |  |              | SCRI_RS_188572 |    | 126.1 | 3.7 | 0.02 | 0.010  | 0.003 | -            | -            | -                                              |
|                      |  |              | SCRI_RS_2824   | 5H | 151.9 | 3.1 | 0.04 | 0.008  | 0.002 | MLOC_73050.2 | 151.9        | Photosystem I PsaE, reaction centre subunit IV |
|                      |  |              | SCRI_RS_158266 | 7H | 12.8  | 3.1 | 0.36 | -0.003 | 0.001 | MLOC_69817.1 | 12.8         | Mn/iron superoxide dismutase                   |
|                      |  |              | 11_10294       |    | 46.6  | 4.0 | 0.16 | -0.014 | 0.003 |              |              |                                                |
|                      |  |              | SCRI_RS_221759 |    | 46.6  | 5.9 | 0.08 | -0.019 | 0.004 |              |              |                                                |
|                      |  |              | SCRI_RS_182631 |    | 46.8  | 5.6 | 0.04 | -0.025 | 0.005 |              |              |                                                |
|                      |  |              | SCRI_RS_188937 |    | 46.8  | 5.6 | 0.04 | -0.025 | 0.005 |              |              |                                                |
|                      |  |              | 11_11287       |    | 48.1  | 4.7 | 0.04 | 0.023  | 0.005 |              |              |                                                |
| <b>V<sub>J</sub></b> |  | <b>GH13A</b> | 11_20260       | 1H | 48.1  | 4.7 | 0.04 | -0.023 | 0.005 | MLOC_61942.1 | 50.9         | PP2C, Mn/Mg aspartate binding site             |
|                      |  |              | 11_20698       |    | 48.1  | 4.8 | 0.05 | 0.023  | 0.005 |              |              |                                                |
|                      |  |              | 11_21193       |    | 48.1  | 4.7 | 0.04 | -0.023 | 0.005 |              |              |                                                |
|                      |  |              | 12_10300       |    | 48.1  | 4.7 | 0.04 | -0.023 | 0.005 |              |              |                                                |
|                      |  |              | 12_30043       |    | 48.1  | 4.8 | 0.05 | 0.023  | 0.005 |              |              |                                                |

|  |  |    |                |       |     |      |        |       |              |       |                                    |
|--|--|----|----------------|-------|-----|------|--------|-------|--------------|-------|------------------------------------|
|  |  |    | 12_30404       | 48.1  | 4.7 | 0.04 | -0.023 | 0.005 |              |       |                                    |
|  |  |    | 12_30562       | 48.1  | 4.8 | 0.05 | 0.023  | 0.005 |              |       |                                    |
|  |  |    | SCRI_RS_138691 | 48.2  | 5.1 | 0.04 | 0.026  | 0.006 |              |       |                                    |
|  |  |    | 11_21312       | 48.4  | 3.1 | 0.12 | -0.011 | 0.003 |              |       |                                    |
|  |  |    | 11_21357       | 48.4  | 4.0 | 0.10 | -0.015 | 0.004 |              |       |                                    |
|  |  |    | SCRI_RS_171543 | 48.4  | 4.3 | 0.10 | -0.015 | 0.004 |              |       |                                    |
|  |  |    | SCRI_RS_7197   | 48.4  | 3.0 | 0.41 | 0.010  | 0.003 |              |       |                                    |
|  |  |    | 11_20912       | 48.7  | 3.1 | 0.12 | -0.012 | 0.004 |              |       |                                    |
|  |  |    | 11_20432       | 60.1  | 3.1 | 0.10 | 0.012  | 0.004 |              |       |                                    |
|  |  |    | 12_31099       | 61.2  | 3.4 | 0.09 | 0.014  | 0.004 | -            | -     | -                                  |
|  |  |    | 12_11242       | 65.1  | 3.7 | 0.02 | 0.028  | 0.007 | MLOC_56051.1 | 65.4  |                                    |
|  |  |    | 12_11045       | 67.8  | 5.2 | 0.02 | 0.037  | 0.008 |              |       |                                    |
|  |  | 7H | 12_30997       | 67.8  | 4.0 | 0.02 | 0.028  | 0.007 |              |       | Chlorophyll a/b binding protein    |
|  |  |    | 12_11202       | 68.0  | 5.2 | 0.02 | 0.037  | 0.008 | MLOC_20487.1 | 68.4  |                                    |
|  |  |    | 12_11103       | 68.1  | 5.2 | 0.02 | -0.037 | 0.008 |              |       |                                    |
|  |  |    | 11_10526       | 46.5  | 3.1 | 0.46 | -0.015 | 0.005 |              |       |                                    |
|  |  |    | 11_10294       | 46.6  | 3.1 | 0.16 | -0.014 | 0.004 |              |       |                                    |
|  |  |    | SCRI_RS_182631 | 46.8  | 3.7 | 0.04 | -0.024 | 0.006 |              |       |                                    |
|  |  |    | SCRI_RS_188937 | 46.8  | 3.7 | 0.04 | -0.024 | 0.006 |              |       |                                    |
|  |  |    | 11_11287       | 48.1  | 3.1 | 0.04 | 0.023  | 0.007 |              |       |                                    |
|  |  |    | 11_20260       | 48.1  | 3.1 | 0.04 | -0.023 | 0.007 |              |       |                                    |
|  |  |    | 11_21193       | 48.1  | 3.1 | 0.04 | -0.023 | 0.007 |              |       |                                    |
|  |  |    | 12_10300       | 48.1  | 3.1 | 0.04 | -0.023 | 0.007 |              |       |                                    |
|  |  | 1H | 12_30404       | 48.1  | 3.1 | 0.04 | -0.023 | 0.007 | MLOC_61942.1 | 50.9  | PP2C, Mn/Mg aspartate binding site |
|  |  |    | 12_31208       | 48.1  | 4.1 | 0.40 | 0.014  | 0.004 |              |       |                                    |
|  |  |    | SCRI_RS_124377 | 48.2  | 4.3 | 0.40 | -0.015 | 0.004 |              |       |                                    |
|  |  |    | SCRI_RS_138691 | 48.2  | 3.1 | 0.04 | 0.024  | 0.007 |              |       |                                    |
|  |  |    | SCRI_RS_143927 | 48.2  | 4.1 | 0.40 | -0.014 | 0.004 |              |       |                                    |
|  |  |    | SCRI_RS_186830 | 48.2  | 4.5 | 0.41 | 0.015  | 0.004 |              |       |                                    |
|  |  |    | SCRI_RS_189586 | 48.2  | 4.1 | 0.40 | -0.014 | 0.004 |              |       |                                    |
|  |  |    | SCRI_RS_7197   | 48.4  | 3.7 | 0.41 | 0.014  | 0.004 |              |       |                                    |
|  |  |    | SCRI_RS_48964  | 107.2 | 3.2 | 0.01 | -0.042 | 0.012 | -            | -     | -                                  |
|  |  | 2H | SCRI_RS_157504 | 120.7 | 3.0 | 0.02 | 0.028  | 0.008 | AK373061     | 120.7 | PP2C, Mn/Mg aspartate binding site |
|  |  |    | 11_20975       | 61.8  | 3.1 | 0.40 | 0.010  | 0.003 | MLOC_62559.1 | 56.3  |                                    |
|  |  | 7H |                |       |     |      |        |       | MLOC_56051.1 | 65.4  | Chlorophyll a/b binding protein    |
|  |  |    | 12_30867       | 126.1 | 3.0 | 0.19 | 0.003  | 0.001 |              |       |                                    |
|  |  | 5H | 12_30868       | 126.1 | 3.9 | 0.09 | -0.005 | 0.001 | -            | -     | -                                  |
|  |  |    | SCRI_RS_164602 | 53.3  | 3.0 | 0.37 | 0.004  | 0.001 |              |       |                                    |
|  |  |    | SCRI_RS_210918 | 53.3  | 3.0 | 0.37 | 0.004  | 0.001 | MLOC_72290.1 | 53.8  | Chlorophyll a/b binding protein    |
|  |  |    | 12_30857       | 56.2  | 3.2 | 0.49 | -0.003 | 0.001 |              |       |                                    |
|  |  |    | 11_11246       | 75.5  | 3.1 | 0.34 | 0.003  | 0.001 |              |       |                                    |
|  |  |    | SCRI_RS_131992 | 75.5  | 3.5 | 0.46 | -0.003 | 0.001 |              |       |                                    |
|  |  |    | SCRI_RS_144862 | 75.5  | 3.4 | 0.46 | 0.003  | 0.001 |              |       |                                    |
|  |  | 6H | SCRI_RS_154582 | 75.5  | 3.1 | 0.47 | 0.003  | 0.001 | MLOC_12843.2 | 78.3  | Chlorophyll a/b binding protein    |
|  |  |    | SCRI_RS_181031 | 75.5  | 3.2 | 0.45 | 0.003  | 0.001 |              |       |                                    |
|  |  |    | SCRI_RS_217187 | 75.5  | 3.1 | 0.47 | -0.003 | 0.001 |              |       |                                    |
|  |  |    | SCRI_RS_184811 | 76.1  | 3.1 | 0.34 | -0.003 | 0.001 |              |       |                                    |
|  |  |    | 11_10526       | 46.5  | 3.2 | 0.46 | -0.017 | 0.008 |              |       |                                    |
|  |  |    | SCRI_RS_182631 | 46.8  | 3.8 | 0.04 | -0.034 | 0.011 |              |       |                                    |
|  |  | 1H | SCRI_RS_188937 | 46.8  | 3.8 | 0.04 | -0.034 | 0.011 | MLOC_61942.1 | 50.85 | PP2C, Mn/Mg aspartate binding site |
|  |  |    | 11_11287       | 48.1  | 3.7 | 0.04 | 0.038  | 0.012 |              |       |                                    |

V<sub>k</sub>

|              |    |                |       |     |      |        |       |              |        |                                    |
|--------------|----|----------------|-------|-----|------|--------|-------|--------------|--------|------------------------------------|
|              |    | 11_20260       | 48.1  | 3.7 | 0.04 | -0.047 | 0.012 |              |        |                                    |
|              |    | 11_20427       | 48.1  | 4.1 | 0.40 | -0.026 | 0.006 |              |        |                                    |
|              |    | 11_20698       | 48.1  | 3.1 | 0.05 | 0.046  | 0.012 |              |        |                                    |
|              |    | 11_20698       | 48.1  | 3.9 | 0.05 | 0.046  | 0.012 |              |        |                                    |
|              |    | 11_21193       | 48.1  | 3.7 | 0.04 | -0.047 | 0.012 |              |        |                                    |
|              |    | 12_10300       | 48.1  | 3.7 | 0.04 | -0.047 | 0.012 |              |        |                                    |
|              |    | 12_30043       | 48.1  | 3.1 | 0.05 | 0.046  | 0.012 |              |        |                                    |
|              |    | 12_30043       | 48.1  | 3.9 | 0.05 | 0.046  | 0.012 |              |        |                                    |
|              |    | 12_30404       | 48.1  | 3.7 | 0.04 | -0.047 | 0.012 |              |        |                                    |
|              |    | 12_30562       | 48.1  | 3.1 | 0.05 | 0.046  | 0.012 |              |        |                                    |
|              | 1H | 12_30562       | 48.1  | 3.9 | 0.05 | 0.046  | 0.012 | MLOC_61942.1 | 50.85  | PP2C, Mn/Mg aspartate binding site |
| <b>GH13B</b> |    | 12_31208       | 48.1  | 5.0 | 0.40 | 0.029  | 0.006 |              |        |                                    |
|              |    | SCRI_RS_193640 | 48.1  | 4.1 | 0.40 | -0.026 | 0.006 |              |        |                                    |
|              |    | SCRI_RS_124377 | 48.2  | 5.2 | 0.40 | -0.030 | 0.006 |              |        |                                    |
|              |    | SCRI_RS_138691 | 48.2  | 3.8 | 0.04 | 0.050  | 0.013 |              |        |                                    |
|              |    | SCRI_RS_143927 | 48.2  | 5.0 | 0.40 | -0.029 | 0.006 |              |        |                                    |
|              |    | SCRI_RS_186830 | 48.2  | 5.2 | 0.41 | 0.030  | 0.006 |              |        |                                    |
|              |    | SCRI_RS_189586 | 48.2  | 5.0 | 0.40 | -0.029 | 0.006 |              |        |                                    |
|              |    | SCRI_RS_7197   | 48.4  | 4.2 | 0.41 | 0.026  | 0.006 |              |        |                                    |
|              |    | 11_20912       | 48.7  | 3.1 | 0.12 | -0.017 | 0.008 |              |        |                                    |
|              |    | SCRI_RS_48964  | 107.2 | 3.7 | 0.01 | -0.084 | 0.022 | -            | -      | -                                  |
|              | 2H | SCRI_RS_157504 | 120.7 | 3.2 | 0.02 | 0.056  | 0.016 | AK373061     | 120.68 | PP2C, Mn/Mg aspartate binding site |
|              |    | SCRI_RS_231015 | 147.3 | 4.4 | 0.18 | 0.014  | 0.003 | -            | -      | -                                  |
|              | 2H | 11_21511       | 52.6  | 3.7 | 0.35 | -0.016 | 0.004 | AK374059     | 52.62  | PP2C, Mn/Mg aspartate binding site |
|              | 3H | 11_21414       | 49.9  | 3.1 | 0.21 | -0.010 | 0.003 | AK368229     | 47.92  | Chlorophyll a/b binding protein    |
| <b>LJ13</b>  | 5H | 12_30826       | 140.9 | 3.0 | 0.17 | 0.010  | 0.003 | MLOC_18354.1 | 51.33  |                                    |
|              | 7H |                |       |     |      |        |       | -            | -      | -                                  |
